# Supplementary material
Source: bioRxiv or medRxiv preprint supplement (https://www.biorxiv.org/highwire/filestream/93423/field_highwire_adjunct_files/1/303644-2.pdf)
Supplement: Supplementary file [file 303644-2.pdf]

## Supplementary text for:

### **Probing compression versus stretch activated recruitment of cortical actin and apical junction proteins using mechanical stimulations of suspended doublets.**

#### **Stretched CaCo Cells monolayers.**

We extended our study to the examination of mature tight junctions formed between cells in a monolayer. As S180 cannot form dense monolayers we used Caco-2 cells, which are an extensively studied epithelial cell line that form well-defined polarized intercellular junctions with apical actin belt, mature adherens, and tight junctions. To assess the mature tight junctions we measured changes in the stretch-induced junctional proteins by quantitative immunofluorescence microscopy. As these cells cannot survive in suspension we could not use the previous system, and chose instead to grow the Caco-2 cells to confluence on stretchable membranes. These were then subjected to an equiaxial stretching with 10% constant strain for 5 min. The apical and tight junction regions of immunofluorescently labelled monolayers were then imaged using 100X confocal microscopy. Fluorescence of ZO-1 and Occludin peaked at these regions. We determined the level of each protein at individual apical junctions based on linescan analysis, based on the average intensity of a 1  $\mu\text{m}$ -long central junction region for quantification (See Method section for detailed protocol). All treatment and stretch-induced protein recruitments were normalized against the unstretched controls.

In line with the established observations, **Supplementary Figure 9-11** shows that stretching the Caco-2 monolayer resulted in a significant reinforcement in junctional F-actin ( $24 \pm 3.5\%$ s.e.m.,  $n=120$  junctions), E-cadherin ( $40 \pm 6\%$ s.e.m.,  $n=219$

junctions), ZO-1 ( $39 \pm 4.5\%$ s.e.m.,  $n=219$  junctions), and occludin ( $82 \pm 3\%$ s.e.m.,  $n=219$  junctions). Despite the substantial increase in the baseline levels of each protein at the junction ( $22.5 \pm 5\%$ s.e.m. for actin,  $n=72$  junctions; and  $44 \pm 4\%$ s.e.m. for E-cadherin,  $69 \pm 4\%$ s.e.m. for ZO-1 and  $8 \pm 2.5\%$ s.e.m. for occludin,  $n=326$  junctions), inhibition of actin dynamics using Jasplakinolide (100nM, 60min), abrogated their stretch-induced junctional recruitment. Of particular note, junctional F-actin levels showed a drastic decrease upon stretching in Jasplakinolide-treated cells (by  $80 \pm 2\%$ s.e.m.,  $n=76$  junctions). The actin structure across the junction also appeared disrupted. In this case it reorganized into a more diffuse pattern across the cell contacts. In contrast, E-cadherin, ZO-1 and occludin remained localized at the junctions in Jasplakinolide-treated cells after stretching. These results indicate that the recruitment of molecules to adherens and tight junctions is responsive to stretching, and strengthens junction reinforcement; an indispensable role played primarily by the dynamic actin network.

We further tested the role of mechanosensing by E-cadherin in the process. E-cadherin was reduced by RNAi in mature Caco-2 monolayers (>80% reduction by immunoblotting) (Supplementary Figure 10). To further minimize the potential influence of residual E-cadherin, only junctions with the lowest E-cadherin intensity (0-20%) were included in the quantification. Caco-2 has been reported to express predominantly E-cadherin<sup>1</sup>. The mislocalization of alpha-catenin and beta-catenin upon E-cadherin siRNA treatment indicates the absence of any compensatory mechanism by overexpression of P- or N-cadherins. Supplementary Figure 9 shows that E-cadherin depleted junctions preserved a reduced but substantial level of actin that was then increased by  $225 \pm 5\%$ s.e.m. ( $n=266$  junctions) upon mechanical

stretching. This strongly suggests that the reinforcement of junctional actin did not arise exclusively from E-cadherin dependent mechanosensing.

### **Supplementary bibliography**

- <sup>1</sup> M. Olander, J. R. Wisniewski, P. Matsson, P. Lundquist, and P. Artursson, *J. Pharm. Sci.* **105** (2), 817 (2016).
